# Supplementary material for: Dipolar relaxation in thin films of supramolecular stacks of benzenecarboxamides and insights to enhance their ferroelectric characteristics
Source: Royal Society of Chemistry journal article supplement (doi:10.1039/d0cp05239f), 2021-01-01
Supplement: d0cp05239f1.pdf [file d0cp05239f1.pdf]

# Supporting Information: Dipolar Relaxation in Thin Films of Supramolecular Stacks of Benzenecarboxamides: Insights to Enhance their Ferroelectric Characteristics

Divya B. Korlepara and Sundaram Balasubramanian\*

*Chemistry and Physics of Materials Unit,*

*Jawaharlal Nehru Centre for Advanced Scientific Research, Bangalore 560 064, India.*

E-mail: [bala@jncasr.ac.in](mailto:bala@jncasr.ac.in)

## Details of MD simulations:

The molecules were considered in an all-atom representation and the interaction parameters were taken from the DREIDING force field.<sup>1</sup> The functional form of the force field is provided in Equations 1 and 2 below. The interaction parameters are provided in Tables S1- S6 for the sake of completeness. The atom notations are:  $C_3-sp^3$ ,  $C_2$ -carbon atom of amide group,  $C_R$ -aromatic carbon, H-Hydrogen,  $H_{hb}$ -Hydrogen participating in hydrogen bond,  $N_R$ -Nitrogen,  $O_R$ -Oxygen and Cl-Chlorine of tetrachloromethane.

$$E = \sum^{\text{bond}} K_r (r - r_o)^2 + \sum^{\text{angle}} K_\theta (\theta - \theta_0)^2 + \sum^{\text{dihedral}} K_\phi [1 + d \cos(n\phi)] + \sum^{\text{improper}} (1/2) K_\omega \left[ \frac{1 + \cos(\omega_0)}{\sin(\omega_0)} \right]^2 [\cos(\omega) - \cos(\omega_0)] + E_{nb} \quad (1)$$

$$E_{nb} = E_{vdW} + E_Q + E_{hb}$$

$$\text{where, } E_{vdW} = A \exp(-Cr_{ij}) - \frac{B}{r_{ij}^6}$$

$$E_{hb} = \begin{cases} L(r) & r < r_{in} \\ S(r) * LJ(r) & r_{in} < r < r_{out} \\ 0 & r > r_{out} \end{cases} \quad (2)$$

$$\text{Where, } LJ(r) = D_{hb} \left[ 5 \left( \frac{R_{hb}}{R_{DA}} \right)^{12} - 6 \left( \frac{R_{hb}}{R_{DA}} \right)^{10} \right] \cos^4(\theta_{DHA})$$

$$S(r) = \frac{[r_{out}^2 - r^2]^2 [r_{out}^2 + 2r^2 - 3r_{in}^2]}{[r_{out}^2 - r_{in}^2]^3}$$

$$E_Q = \frac{q_i q_j}{4\pi\epsilon_0 r_{ij}}$$

## Force-field parameters:

**Table S1: Non-bonded interaction parameters of atoms in system.**

| Atom pairs                       | pair style | A ( $\frac{kcal}{mole}$ ) | C ( $\text{\AA}^{-1}$ ) | B ( $\frac{\text{\AA}^6 * kcal}{mole}$ ) |
|----------------------------------|------------|---------------------------|-------------------------|------------------------------------------|
| C <sub>2</sub> ,C <sub>2</sub>   | $E_{vdW}$  | 88366.7126395             | 0.2777754               | 583.0176588                              |
| C <sub>2</sub> ,C <sub>3</sub>   | $E_{vdW}$  | 88366.7126395             | 0.2777754               | 583.0176588                              |
| C <sub>2</sub> ,C <sub>R</sub>   | $E_{vdW}$  | 88366.7126395             | 0.2777754               | 583.0176588                              |
| C <sub>2</sub> ,H                | $E_{vdW}$  | 17353.2373205             | 0.2675420               | 135.2359749                              |
| C <sub>2</sub> ,H <sub>hb</sub>  | $E_{vdW}$  | 1199.2541785              | 0.2718906               | 11.1370044                               |
| C <sub>2</sub> ,N <sub>R</sub>   | $E_{vdW}$  | 73336.2339858             | 0.2709990               | 438.3045053                              |
| C <sub>2</sub> ,O <sub>R</sub>   | $E_{vdW}$  | 69732.3531147             | 0.2645411               | 395.6858342                              |
| C <sub>2</sub> ,Cl               | $E_{vdW}$  | 141410.6995235            | 0.2813384               | 1051.9927862                             |
| C <sub>3</sub> ,C <sub>3</sub>   | $E_{vdW}$  | 88366.7126395             | 0.2777754               | 583.0176588                              |
| C <sub>3</sub> ,C <sub>R</sub>   | $E_{vdW}$  | 88366.7126395             | 0.2777754               | 583.0176588                              |
| C <sub>3</sub> ,H                | $E_{vdW}$  | 17353.2373205             | 0.2675420               | 135.2359749                              |
| C <sub>3</sub> ,H <sub>hb</sub>  | $E_{vdW}$  | 1199.2541785              | 0.2718906               | 11.1370044                               |
| C <sub>3</sub> ,N <sub>R</sub>   | $E_{vdW}$  | 73336.2339858             | 0.2709990               | 438.3045053                              |
| C <sub>3</sub> ,O <sub>R</sub>   | $E_{vdW}$  | 69732.3531147             | 0.2645411               | 395.6858342                              |
| C <sub>3</sub> ,Cl               | $E_{vdW}$  | 141410.6995235            | 0.2813384               | 1051.9927862                             |
| C <sub>R</sub> ,C <sub>R</sub>   | $E_{vdW}$  | 88366.7126395             | 0.2777754               | 583.0176588                              |
| C <sub>R</sub> ,H                | $E_{vdW}$  | 17353.2373205             | 0.2675420               | 135.2359749                              |
| C <sub>R</sub> ,H <sub>hb</sub>  | $E_{vdW}$  | 1199.2541785              | 0.2718906               | 11.1370044                               |
| C <sub>R</sub> ,N <sub>R</sub>   | $E_{vdW}$  | 73336.2339858             | 0.2709990               | 438.3045053                              |
| C <sub>R</sub> ,O <sub>R</sub>   | $E_{vdW}$  | 69732.3531147             | 0.2645411               | 395.6858342                              |
| C <sub>R</sub> ,Cl               | $E_{vdW}$  | 141410.6995235            | 0.2813384               | 1051.9927862                             |
| H,H                              | $E_{vdW}$  | 3407.7859921              | 0.2580359               | 31.3691509                               |
| H,H <sub>hb</sub>                | $E_{vdW}$  | 235.5065810               | 0.2620786               | 2.5833242                                |
| H,N <sub>R</sub>                 | $E_{vdW}$  | 14401.5889528             | 0.2612501               | 101.6685107                              |
| H,O <sub>R</sub>                 | $E_{vdW}$  | 13693.8677062             | 0.2552434               | 91.7827423                               |
| H,Cl                             | $E_{vdW}$  | 141410.6995235            | 0.2813384               | 1051.9927862                             |
| H <sub>hb</sub> ,H <sub>hb</sub> | $E_{vdW}$  | 16.2754791                | 0.2662500               | 0.2127429                                |
| H <sub>hb</sub> ,N <sub>R</sub>  | $E_{vdW}$  | 995.2705314               | 0.2653949               | 8.3726438                                |
| H <sub>hb</sub> ,O <sub>R</sub>  | $E_{vdW}$  | 946.3610601               | 0.2591984               | 7.5585273                                |
| H <sub>hb</sub> ,Cl              | $E_{vdW}$  | 1919.1318453              | 0.2753033               | 20.0955291                               |
| N <sub>R</sub> ,N <sub>R</sub>   | $E_{vdW}$  | 60862.3208284             | 0.2645453               | 329.5111845                              |
| N <sub>R</sub> ,O <sub>R</sub>   | $E_{vdW}$  | 57871.4315792             | 0.2583879               | 297.4710649                              |
| N <sub>R</sub> ,Cl               | $E_{vdW}$  | 117357.8583902            | 0.2743891               | 790.8734337                              |
| O <sub>R</sub> ,O <sub>R</sub>   | $E_{vdW}$  | 55027.5202694             | 0.2525106               | 268.5463760                              |
| O <sub>R</sub> ,Cl               | $E_{vdW}$  | 111590.6718585            | 0.2677707               | 713.9726163                              |
| Cl,Cl                            | $E_{vdW}$  | 226295.4606144            | 0.2849939               | 1898.2080654                             |

**Table S2: Bond parameters**

| Bonded Atoms list               | $K_r$ (kcal/mol/Å <sup>2</sup> ) | $r_0$ (Å) |
|---------------------------------|----------------------------------|-----------|
| C <sub>2</sub> ,C <sub>R</sub>  | 525                              | 1.39      |
| C <sub>2</sub> ,N <sub>R</sub>  | 525                              | 1.34      |
| C <sub>2</sub> ,O <sub>2</sub>  | 525                              | 1.35      |
| C <sub>3</sub> ,C <sub>3</sub>  | 350                              | 1.53      |
| C <sub>3</sub> ,H               | 350                              | 1.09      |
| C <sub>3</sub> ,N <sub>R</sub>  | 350                              | 1.41      |
| C <sub>R</sub> ,C <sub>R</sub>  | 525                              | 1.39      |
| C <sub>R</sub> ,H               | 350                              | 1.02      |
| H <sub>hb</sub> ,N <sub>R</sub> | 350                              | 0.97      |
| C <sub>3</sub> ,Cl              | 350                              | 1.757     |

**Table S3: Angle parameters**

| Atoms forming angles                            | $K_\theta$ (kcal/mol/rad <sup>2</sup> ) | $\theta_0$ (°) |
|-------------------------------------------------|-----------------------------------------|----------------|
| C <sub>3</sub> ,C <sub>3</sub> ,C <sub>3</sub>  | 50                                      | 109.471        |
| C <sub>3</sub> ,C <sub>3</sub> ,C <sub>R</sub>  | 50                                      | 109.471        |
| C <sub>3</sub> ,C <sub>3</sub> ,H               | 50                                      | 109.471        |
| C <sub>3</sub> ,C <sub>3</sub> ,N <sub>R</sub>  | 50                                      | 109.471        |
| C <sub>3</sub> ,C <sub>R</sub> ,C <sub>R</sub>  | 50                                      | 120.0          |
| C <sub>3</sub> ,N <sub>R</sub> ,C <sub>R</sub>  | 50                                      | 120.0          |
| C <sub>3</sub> ,N <sub>R</sub> ,H <sub>hb</sub> | 50                                      | 120.0          |
| C <sub>R</sub> ,C <sub>3</sub> ,H               | 50                                      | 109.471        |
| C <sub>R</sub> ,C <sub>R</sub> ,C <sub>R</sub>  | 50                                      | 120.0          |
| C <sub>R</sub> ,C <sub>R</sub> ,C <sub>2</sub>  | 50                                      | 120.0          |
| C <sub>R</sub> ,C <sub>R</sub> ,H               | 50                                      | 120.0          |
| C <sub>R</sub> ,C <sub>2</sub> ,N <sub>R</sub>  | 50                                      | 120.0          |
| C <sub>R</sub> ,C <sub>2</sub> ,O <sub>R</sub>  | 50                                      | 120.0          |
| C <sub>2</sub> ,N <sub>R</sub> ,H <sub>hb</sub> | 50                                      | 120.0          |
| H,C <sub>3</sub> ,H                             | 50                                      | 109.471        |
| H,C <sub>3</sub> ,N <sub>R</sub>                | 50                                      | 109.471        |
| N <sub>R</sub> ,C <sub>2</sub> ,O <sub>R</sub>  | 50                                      | 120.0          |
| Cl,C <sub>3</sub> ,Cl                           | 50                                      | 109.471        |

**Table S4: Dihedral parameters**

| Atoms List (order specific) | $K_\phi$ (kcal/mol) | d  | n |
|-----------------------------|---------------------|----|---|
| $C_2, C_R, C_R, C_R$        | 3.125               | -1 | 2 |
| $C_2, C_R, C_R, C_2$        | 3.125               | -1 | 2 |
| $C_2, C_R, C_R, H$          | 3.125               | -1 | 2 |
| $C_3, C_3, C_3, C_3$        | 0.111               | 1  | 3 |
| $C_3, C_3, C_3, H$          | 0.111               | 1  | 3 |
| $C_3, C_3, C_3, N_R$        | 0.111               | 1  | 3 |
| $C_3, C_3, N_R, C_2$        | 0.166               | 1  | 3 |
| $C_3, C_3, N_R, H_{hb}$     | 0.166               | 1  | 3 |
| $C_R, C_2, N_R, C_3$        | 3.125               | -1 | 2 |
| $C_R, C_2, N_R, H_{hb}$     | 3.125               | -1 | 2 |
| $C_R, C_R, C_R, C_R$        | 3.125               | -1 | 2 |
| $C_R, C_R, C_R, H$          | 3.125               | -1 | 2 |
| $H, C_3, C_3, H$            | 0.111               | 1  | 3 |
| $H, C_3, C_3, N_R$          | 0.111               | 1  | 3 |
| $H, C_3, N_R, C_2$          | 0.166               | 1  | 3 |
| $H, C_3, N_R, H_{hb}$       | 0.166               | 1  | 3 |
| $H, C_R, C_R, H$            | 0.111               | 1  | 3 |
| $H, C_R, C_R, C_R$          | 3.125               | -1 | 2 |
| $N_R, C_2, C_R, C_R$        | 0.625               | -1 | 2 |
| $O_R, C_2, C_R, C_R$        | 0.625               | -1 | 2 |
| $O_R, C_2, N_R, C_3$        | 3.125               | -1 | 2 |
| $O_R, C_2, N_R, H_{hb}$     | 3.125               | -1 | 2 |

**Table S5: Improper dihedral parameters**

| Atoms List (order specific) | $K_\omega$ (kcal/mol) | $\omega_0$ (°) |
|-----------------------------|-----------------------|----------------|
| $C_3, C_2, N_R, H_{hb}$     | 40                    | 0              |
| $C_R, C_R, C_R, C_2$        | 40                    | 0              |
| $C_R, C_R, C_R, H$          | 40                    | 0              |
| $C_R, N_R, C_2, O_R$        | 40                    | 0              |

**Table S6: Hydrogen bond parameters**

| System | $r_{in}$ (Å) | $r_{out}$ (Å) | $\theta_{DHA}$ (°) |
|--------|--------------|---------------|--------------------|
| 2BC    | 2.5          | 3.5           | 120.0              |
| 3BC    | 4.3          | 4.4           | 130.0              |
| 4BC    | 2.5          | 3.5           | 120.0              |
| 5BC    | 3.0          | 3.1           | 150.0              |
| 6BC    | 2.5          | 3.5           | 120.0              |

## Solution Phase:

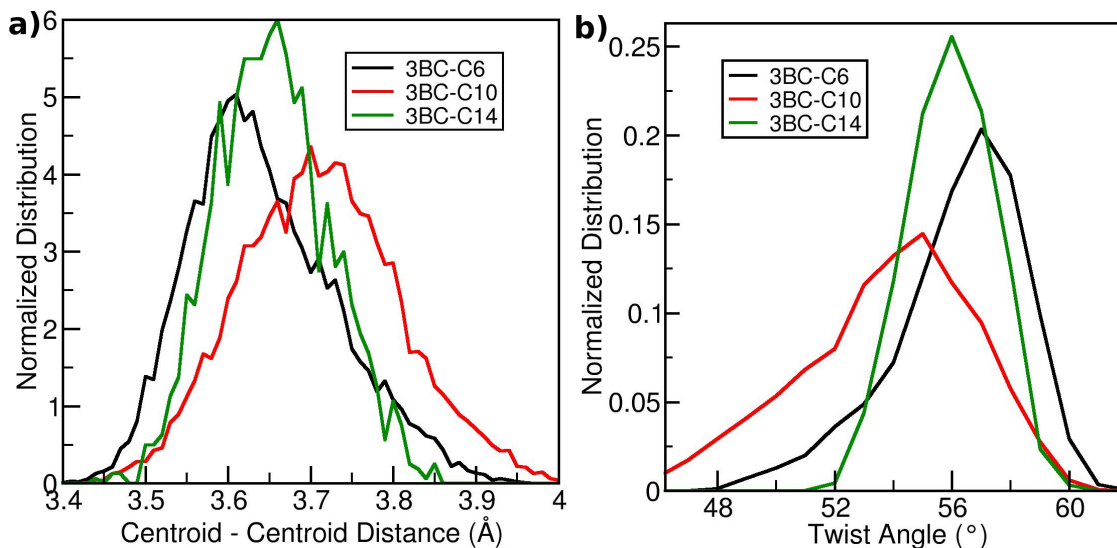

**Figure S1:** Results from MD simulations of preformed decamer of 3BC homologues in solution at 298.15 K (a) Normalized distribution of centroid-centroid distance and (b) Normalized distribution of twist angle.

## Liquid Crystalline Phase:

### System Details:

**Table S7: Details of LC phase simulations**

| System  | Number of stacks | Number of molecules per stack | Total number of molecules | Total number of atoms |
|---------|------------------|-------------------------------|---------------------------|-----------------------|
| 3BC-C6  | 9                | 12                            | 108                       | 8424                  |
| 3BC-C10 | 9                | 12                            | 108                       | 12312                 |
| 3BC-C14 | 9                | 12                            | 108                       | 16200                 |
| 5BC-C14 | 9                | 16                            | 144                       | 34848                 |

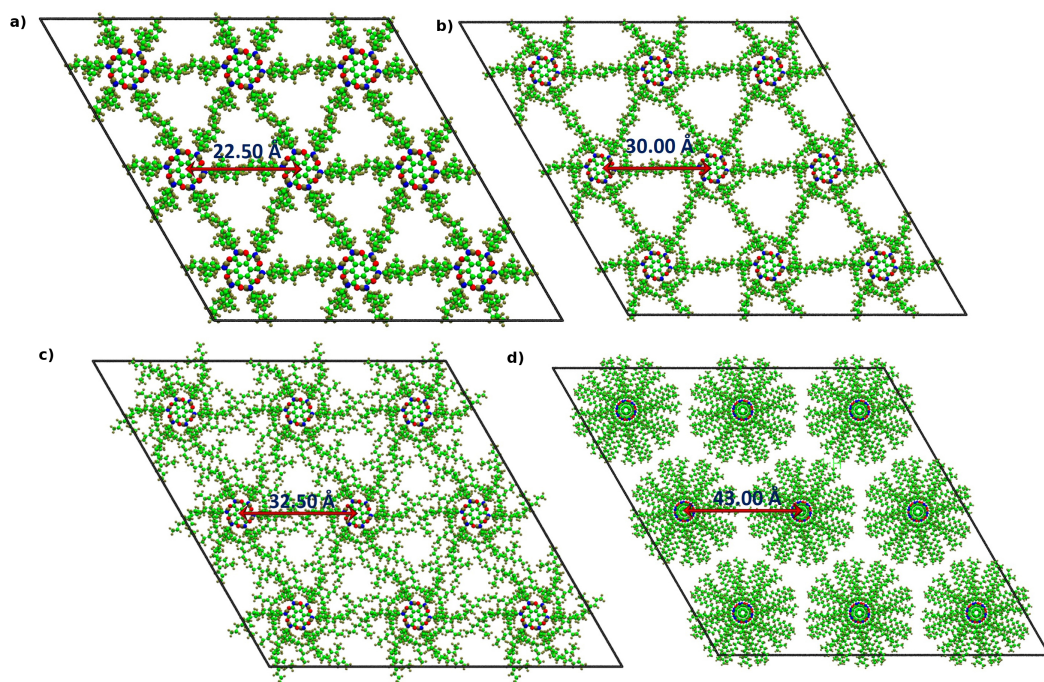

**Figure S2:** Initial structures of the systems in liquid crystalline (LC) phase. All amide dipoles are oriented in the same direction. (a)  $N,N',N''$ -tri(hexyl)-1,3,5-benzenetricarboxamide (3BC-C6), (b)  $N,N',N''$ -tri(decyl)-1,3,5-benzenetricarboxamide (3BC-C10), (c)  $N,N',N''$ -tri(tetradecyl)-1,3,5-benzenetricarboxamide (3BC-C14), and (d)  $N,N',N'',N''',N''''$ -penta(tetradecyl)benzenepentacarboxamide (5BC-C14). Color Scheme: Green - Carbon, Tan - hydrogen, Red - Oxygen, Blue - Nitrogen.

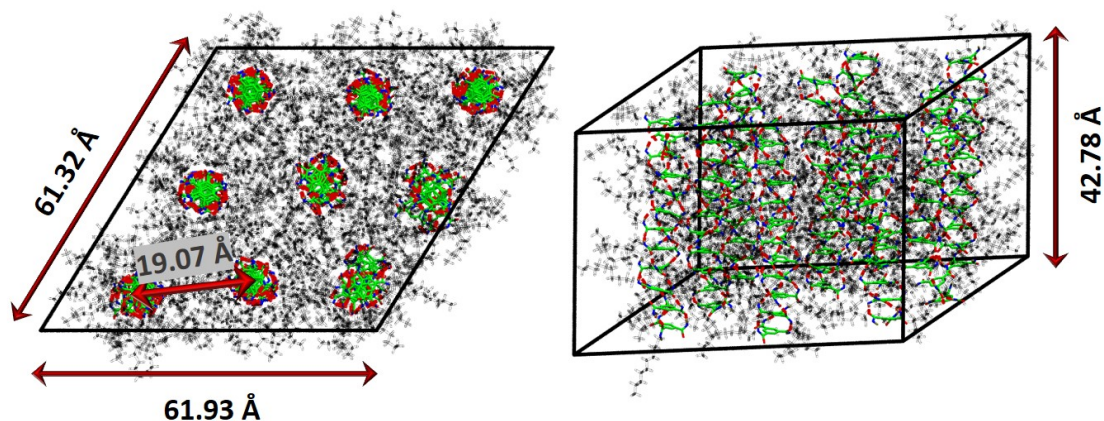

**Figure S3:** The final structure of 3BC-C10 from equilibrium simulations at 460 K. (a) top view and (b) side view. The colour scheme is same as in Figure S2.

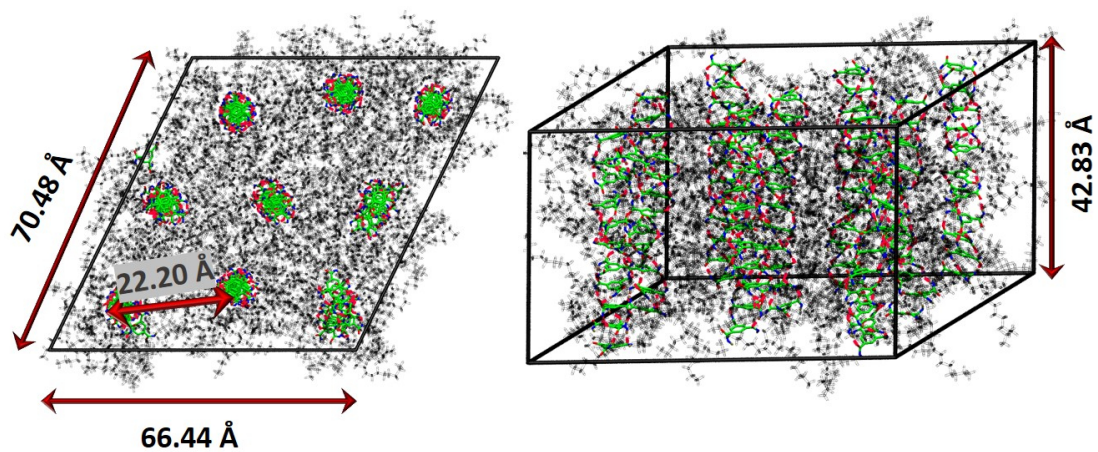

**Figure S4:** The final structure of 3BC-C14 from equilibrium simulations at 460 K. (a) top view and (b) side view. The colour scheme is same as in Figure S2.



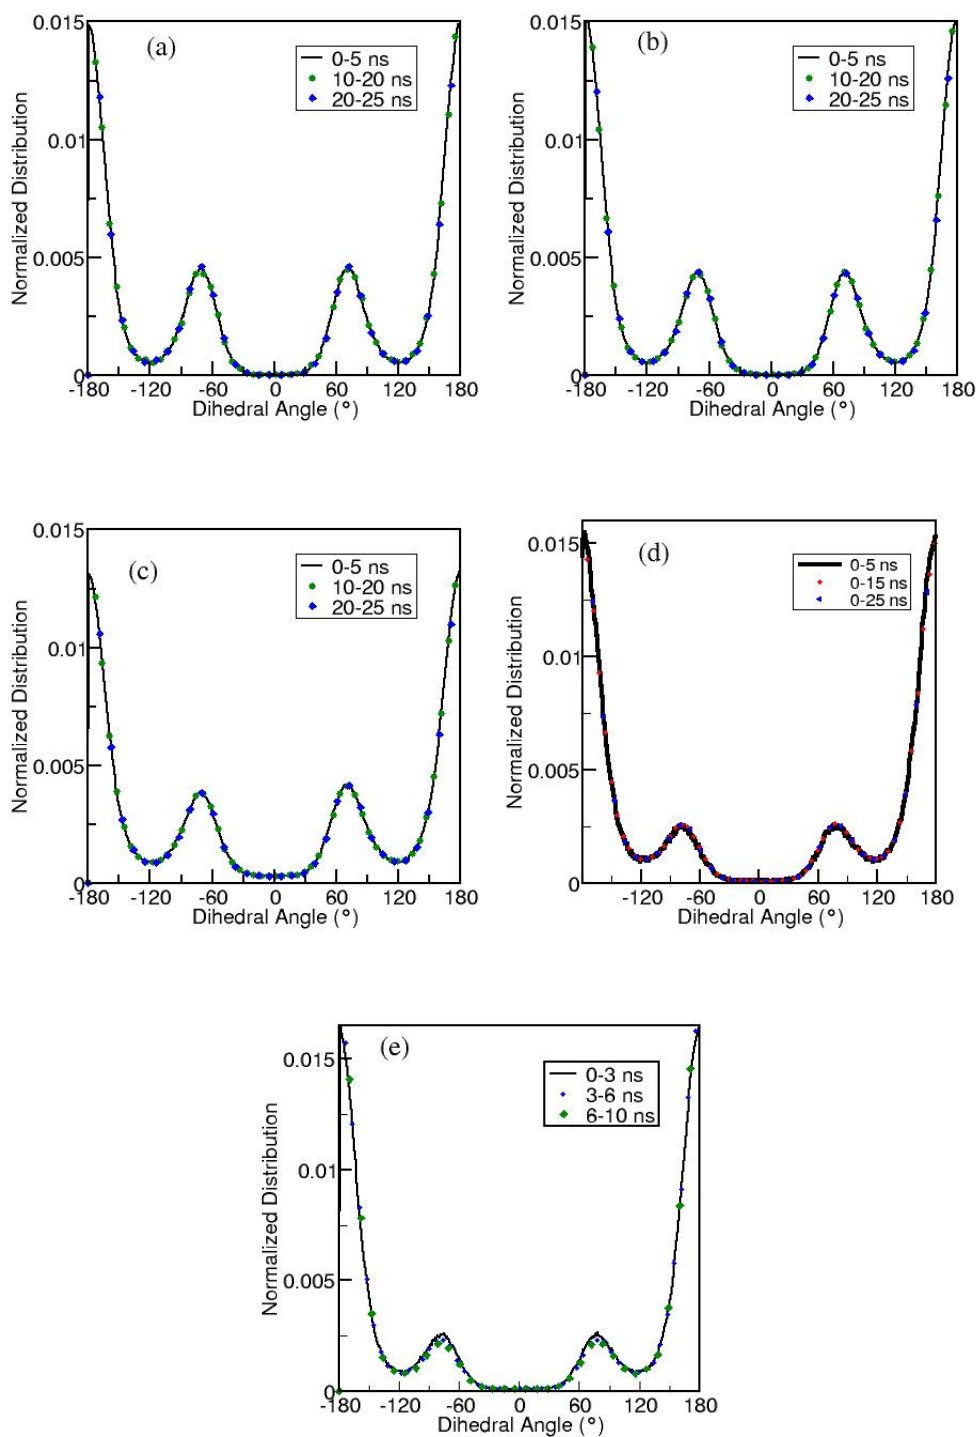

**Figure S5:** C-C-C-C dihedral angle distribution of the alkyl tails in various systems of the LC phase at various time points of corresponding MD trajectories: (a) 3BC-C6 related to Figure 7 of main MS (b) 3BC-C10 related to Figure 7 of main MS (c) 3BC-C14 related to Figure 7 of main MS (d) 5BC-C14 related to Figure 11 of main MS (e) 5BC-C14 related to Figure 12 of main MS.

## References

- (1) Mayo, S. L.; Olafson, B. D.; Goddard, W. A. DREIDING: A Generic Force Field for Molecular Simulations. *J. Phys. Chem.* **1990**, *94*, 8897–8909.
